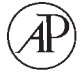

## List of referees

The editors are pleased to record their thanks to all those listed below, who gave their time and expertise to referee papers submitted for inclusion in the Symposium proceedings.

|                 |                |                 |
|-----------------|----------------|-----------------|
| B. Ådlandsvik   | W. Gieskes     | M. Nicholson    |
| D. L. Aksnes    | A. Gislason    | P. Nival        |
| M. Angel        | J. S. Gray     | B. Planque      |
| O. Astthorsson  | W. Greve       | M. Prestidge    |
| R. Bamder       | D. Harbour     | G. Radach       |
| K. Banse        | K.-J. Hesse    | P. C. Reid      |
| S. Batten       | W. Hickel      | F. Rey          |
| G. Behrends     | H.-J. Hirche   | H.-J. Rick      |
| J. van Bennekom | A. Hirst       | R. Riegman      |
| G. C. Cadée     | I. Joint       | S. Rundle       |
| J. E. Cloern    | R. Koppelman   | E. Sakshaug     |
| F. Colijn       | M. Krause      | D. Sameoto      |
| N. Daan         | J. Lenz        | S. Schiel       |
| M. Dickey-Colas | J.-M. Leppänen | H. R. Skjoldahl |
| W. Ebenhoeh     | J. Lewis       | T. Smayda       |
| L. Edler        | O. Lindahl     | V. Smetacek     |
| H. Fock         | H. Lindeboom   | U. Tillmann     |
| K. Foote        | J. A. Lindley  | E. Venrick      |
| U. Gaedke       | H. McCall      | P. Wassmann     |
| G. George       | D. Mills       | E. Willen       |
